# Supplementary material for: Virus-Mediated Alterations in miRNA Factors and Degradation of Viral miRNAs by MCPIP1
Source: PLoS Biol. 2016 Nov 28;14(11):e2000998. doi: 10.1371/journal.pbio.2000998 (PMC5125562; doi:10.1371/journal.pbio.2000998)
Supplement: S1 Data — Tables with numerical data for Figs 2, 3, 4, 5, 6 and 7. (XLSX) [file pbio.2000998.s010.xlsx]

## Sheet: 2B
KSHV-miR-1
	Fold Change	Fold Change	Fold Change
KSHV miR EGFP	1	1	1
KSHV miR MCPIP	0.316315	0.588974	0.496111
KSHV-miR-2
	Fold Change	Fold Change	Fold Change
KSHV miR EGFP	1	1	1
KSHV miR MCPIP	0.645895	0.611585	0.260796
KSHV-miR-3
	Fold Change	Fold Change	Fold Change
KSHV miR EGFP	1	1	1
KSHV miR MCPIP	0.261911	0.529469	0.361156
KSHV-miR-4-3p
	Fold Change	Fold Change	Fold Change
KSHV miR EGFP	1	1	1
KSHV miR MCPIP	0.322563	0.592761	0.443871
KSHV-miR-5
	Fold Change	Fold Change	Fold Change
KSHV miR EGFP	1	1	1
KSHV miR MCPIP	1.12943	1.01364	1.15233
KSHV-miR-6-5p
	Fold Change	Fold Change	Fold Change
KSHV miR EGFP	1	1	1
KSHV miR MCPIP	0.800122	0.973835	0.765336
KSHV-miR-6-3p
	Fold Change	Fold Change	Fold Change
KSHV miR EGFP	1	1	1
KSHV miR MCPIP	0.967312	0.894326	0.812089
KSHV-miR-7
	Fold Change	Fold Change	Fold Change
KSHV miR EGFP	1	1	1
KSHV miR MCPIP	0.507049	0.658771	0.581335
KSHV-miR-8
	Fold Change	Fold Change	Fold Change
KSHV miR EGFP	1	1	1
KSHV miR MCPIP	0.406386	0.744331	0.570348
KSHV-miR-9
	Fold Change	Fold Change	Fold Change
KSHV miR EGFP	1	1	1
KSHV miR MCPIP	0.592693	0.329931	0.339594
KSHV-miR-10a
Undetectable
KSHV-miR-11
	Fold Change	Fold Change	Fold Change
KSHV miR EGFP	1	1	1
KSHV miR MCPIP	0.609673	0.511873	0.419921
KSHV-miR-12
Undetectable

## Sheet: 2C
Fold Change
pri-KSHV miRs 1
	Fold Change	Fold Change	Fold Change
KSHV miR EGFP	1	1	1
KSHV miR MCPIP	1.58446	0.934412	2.3661
pri-KSHV miRs 2
	Fold Change	Fold Change	Fold Change
KSHV miR EGFP	1	1	1
KSHV miR MCPIP	1.95862	1.25072	1.68046

## Sheet: 2D
U6 control
KSHV-miR-1
	Fold Change	Fold Change	Fold Change
KSHV miR EGFP	1	1	1
KSHV miR MCPIP	0.411302	0.0268122	0.308221
KSHV-miR-2
	Fold Change	Fold Change	Fold Change
KSHV miR EGFP	1	1.00001	1
KSHV miR MCPIP	0.704855	0.017938	0.247929
KSHV-miR-3
	Fold Change	Fold Change	Fold Change
KSHV miR EGFP	1	1	1
KSHV miR MCPIP	0.218799	0.0168598	0.234902
KSHV-miR-4
	Fold Change	Fold Change	Fold Change
KSHV miR EGFP	1	1	1
KSHV miR MCPIP	0.332031	0.0149699	0.22834
KSHV-miR-7
	Fold Change	Fold Change	Fold Change
KSHV miR EGFP	1	1	1
KSHV miR MCPIP	0.284983	0.00954691	0.145156
KSHV-miR-8
	Fold Change	Fold Change	Fold Change
KSHV miR EGFP	1	1.00001	1
KSHV miR MCPIP	0.461137	0.00639997	0.353687

## Sheet: 2E
hsa-miR-135b
	Fold Change	Fold Change	Fold Change
pcDNA3.1 EGFP	1.08848	1.00054	1.00868
KSHV miR EGFP	0.959899	0.93144	0.966406
pcDNA3.1 MCPIP	0.738952	0.808956	0.648517
KSHV miR MCPIP	0.812995	0.818371	0.838436

## Sheet: 2F
pri-miR-135b
	Fold Change	Fold Change	Fold Change
KSHV miR EGFP	1	1	1
KSHV miR MCPIP	1.44234	1.38501	1.0912

## Sheet: 2G
KSHV-miR-1
	Fold Change	Fold Change	Fold Change	Fold Change
KSHV miR EGFP	1.03983	0.960165	1.02772	0.972281
KSHV miR MCPIP	1.23658	1.1986	0.975657	1.18054
KSHV-miR-2
	Fold Change	Fold Change	Fold Change	Fold Change
KSHV miR EGFP	1.01386	0.986138	0.954976	1.04502
KSHV miR MCPIP	1.4488	1.43382	1.18389	1.13566
KSHV-miR-3
	Fold Change	Fold Change	Fold Change	Fold Change
KSHV miR EGFP	1.05712	0.942878	1.02599	0.974013
KSHV miR MCPIP	1.30147	1.32422	1.32135	1.30768
KSHV-miR-4-3p
	Fold Change	Fold Change	Fold Change	Fold Change
KSHV miR EGFP	0.927348	1.07265	0.965357	1.03464
KSHV miR MCPIP	1.53281	1.66	1.23041	1.3511
KSHV-miR-7
	Fold Change	Fold Change	Fold Change	Fold Change
KSHV miR EGFP	1.06748	0.932521	1.0381	0.961895
KSHV miR MCPIP	1.37479	1.24333	1.13206	1.15986
KSHV-miR-8
	Fold Change	Fold Change	Fold Change	Fold Change
KSHV miR EGFP	1.00173	0.998267	0.816679	1.18332
KSHV miR MCPIP	1.72608	1.34957	0.761989	1.01596
KSHV-miR-9
	Fold Change	Fold Change	Fold Change	Fold Change
KSHV miR EGFP	1.11216	0.887838	0.986138	1.01386
KSHV miR MCPIP	1.40286	1.37399	1.0904	1.03158
KSHV-miR-11
	Fold Change	Fold Change	Fold Change	Fold Change
KSHV miR EGFP	1.0623	0.937698	1.16484	0.835162
KSHV miR MCPIP	1.29432	1.37287	1.00009	1.02821

## Sheet: 2H
KSHV-miR-1
	Fold Change	Fold Change	Fold Change	Fold Change	Fold Change
siNeg	1	1	1	1	1
siMCPIP	1.31345	1.22375	1.09312	1.09495	1.32911
KSHV-miR-2
	Fold Change	Fold Change	Fold Change	Fold Change	Fold Change
siNeg	1	1	1	1	1
siMCPIP	1.30914	1.32398	1.01208	1.03242	1.36348
KSHV-miR-3
	Fold Change	Fold Change	Fold Change
siNeg	1	1	1
siMCPIP	1.07825	1.07151	1.14152
KSHV-miR-4-3p
	Fold Change	Fold Change	Fold Change
siNeg	1	0.999997	1
siMCPIP	1.65654	1.17832	1.36968
KSHV-miR-5
	Fold Change	Fold Change	Fold Change	Fold Change
siNeg	0.999997	1	1	1
siMCPIP	1.68773	0.984541	1.2118	0.902871
KSHV-miR-6-5p
	Fold Change	Fold Change	Fold Change	Fold Change
siNeg	1	1	1	1
siMCPIP	0.997181	0.783503	1.06707	0.943935
KSHV-miR-6-3p
	Fold Change	Fold Change	Fold Change	Fold Change
siNeg	1.00008	1	1	1
siMCPIP	1.59192	0.996861	1.29175	0.959124
KSHV-miR-7
	Fold Change	Fold Change	Fold Change
siNeg	1	1	1
siMCPIP	1.20641	1.2055	1.3731
KSHV-miR-8
	Fold Change	Fold Change	Fold Change	Fold Change	Fold Change
siNeg	1	1	1	1	1
siMCPIP	1.07331	1.11398	1.22238	1.05876	1.40786
KSHV-miR-9
	Fold Change	Fold Change	Fold Change	Fold Change	Fold Change
siNeg	1	1	1	1	1
siMCPIP	1.57975	1.32674	1.27643	1.13066	1.15489
KSHV-miR-10a
	Fold Change	Fold Change	Fold Change
siNeg	1	1	1
siMCPIP	1.27419	1.24105	1.13327
KSHV-miR-11
	Fold Change	Fold Change	Fold Change	Fold Change	Fold Change
siNeg	1	1	1	1	1
siMCPIP	1.30756	1.28871	1.07685	1.41002	1.07075
KSHV-miR-12
	Fold Change	Fold Change	Fold Change	Fold Change	Fold Change
siNeg	1	1	1	1	1
siMCPIP	1.48551	1.22155	1.36936	1.07551	1.26813

## Sheet: 2I
	rep1	rep2	rep3
K3	5.10264	6.96594	11.8359
K5	41.5517	42.7807	46.6814
K6	66.6116	62.8866	67.9287
	Percent of full-length pre-miRNA remaining

## Sheet: 3A
MCPIP
HUVEC cytokine treatments
2 hr
Untreated	1	1	1	1.00217	1.02873	1.00154	1.00217	1.00506	1.00154	1.00118	1.0001
Il-1b	35.0174	28.2465	31.3414	24.1821	23.8605	25.1284	16.4665	10.0213	19.6544	16.7664	13.9873
TNFa			4.99332	3.70744	3.28594		2.58904		4.89479	3.0081	1.66187
TWEAK	4.22807			2.1317	4.03075		2.62206		5.78252	2.95925
24 hr
Untreated	1	1.02393	1.00376	1.00001	1.00195
Il-1b	27.4741	10.2289	9.35022	13.7315	6.72717
TNFa	4.43828	3.40347	3.07969	4.00494	2.05011
TWEAK	5.81589	1.91263	2.30348	2.26574	1.42969

## Sheet: 3C
mcpip1/actin	rep1	rep2	rep3
mock	1	1	1
kshv	0.551056	0.654268	0.774446

[truncated: 21 more sheets: 4A, 4B, 4C, 4D, 4E, 4F, 4G, 4H, 4I, 5A, 5B, 5C, 6A, 6B, 6C, 6D, 7A, 7B, 7C, 7D …]
