# Supplementary material for: Virus-Mediated Alterations in miRNA Factors and Degradation of Viral miRNAs by MCPIP1
Source: PLoS Biol. 2016 Nov 28;14(11):e2000998. doi: 10.1371/journal.pbio.2000998 (PMC5125562; doi:10.1371/journal.pbio.2000998)
Supplement: S3 Table — Table contains cloning primers and gBlocks for the MCPIP1 reporter plasmids. (XLSX) [file pbio.2000998.s008.xlsx]

## Sheet: Cloning primers
Table 3
Cloning information
Cloning primers
Primer name	Direction		Primer sequence 5' -> 3'
MCPIP1 D141N	Sense		AGACCAGTGGTCATCAACGGGAGCAACGTGGCC
MCPIP1 D141N	Antisense		GGCCACGTTGCTCCCGTTGATGACCACTGGTCT
MCPIP1 KSHV-miR-1 SSM	Sense		taaatattttaagcagaaagtccttacctcatttgacacatcaataaagtacaatcattgtgagc
MCPIP1 KSHV-miR-1 SSM	Antisense		gctcacaatgattgtactttattgatgtgtcaaatgaggtaaggactttctgcttaaaatattta
MCPIP1 KSHV-miR-6-3p SSM1	Sense		gtaggggtcaagggccctgagcttacaccctcttcttctcc
MCPIP1 KSHV-miR-6-3p SSM1	Antisense		ggagaagaagagggtgtaagctcagggcccttgacccctac
MCPIP1 KSHV-miR-7 SSM1	Sense		gtttaaggagacgctgccggtaatgtcggaggtccgtggctg
MCPIP1 KSHV-miR-7 SSM1	Antisense		cagccacggacctccgacattaccggcagcgtctccttaaac
MCPIP1 KSHV-miR-7 SSM2	Sense		ctgtagtttaaggagacgctgaaaaaaacggcgtcggtccgtggctg
MCPIP1 KSHV-miR-7 SSM3	Antisense		cagccacggaccgacgccgtttttttcagcgtctccttaaactacag
KSHV miR cluster	Sense		TCCCAGTAGAGTGACCCAG
KSHV miR cluster	Antisense		GTACGCGGTTGTTTACGCAG
pLS 1361-1381f	Sense		ATGGATAGACACCCTGCTGC
pLS 1447-1467r	Antisense		CTTATCATGTCTGCTCGAAGC
MCPIP1 deletion luciferase reporter constructs
Based on ZC3H12A mRNA (NM_025079.2)
gBlock name	3' UTR (nt)		Sequence 5' -> 3'
MCPIP1 1951-2210	1-259	Deletion 1	gctgcctgtggctggcaagggcagcacccccagcctccaagggccgtcaggctgggctttgggccattgagcagcccattcccagccctgaggcccaccccagaggctggacagagggaggattcaagtcgggaaggaaacccacaaaccaaagatactgtaggattggttctggcccatgcagcacctctagctgtctgcctcagtgggtcagaagcgatcaccctgttgatacacattgtatctctgtagtttaagga
MCPIP1 2211-2460	250-508	Deletion 2	gacgctgccggtaacggcgtcggtccgtggctgaggcccaaaccgtcttttctctcagagggtggggagggaggtgggggcagcagaggcctgggctgggtgccctgtgcacgccaccccacttccgccctacccctgggacgttggccttggctggctagttgggcaccgtgtgcctgccctccaagggcctcctctacgccaatgaggcctcatctgtgctctcgctgggcacgtggcttcatgtcag
MCPIP1 2461-2716	509-763	Deletion 3	taagcaagatgcttcttaataacccaccttctgccccactctattccttatcctgctgcccctgtaggggtcaagggccctccgtctacaccctcttcttctcctccatcctttattcagagtcatctcgcccttccccatgggtgggggaacctgtgtttgtttgtgtgcacatgtaaattttaaatattttaagcagaaagtccttacctcctgtaacacatcaataaagtacaatcattgtgagccctttcaa
